# Supplementary material
Source: Frontiers journal article supplement (https://www.frontiersin.org/articles/527165)
Supplement: Data_Sheet_1.PDF [file Data_Sheet_1.PDF]

**Supplementary Material 1.** CTCAE v4.03 grading for pneumonitis and esophagitis.

| <b>ADVERSE<br/>EVENT</b> | <b>Pneumonitis</b><br><i>Definition: A disorder characterized by inflammation focally or diffusely affecting the lung parenchyma</i> | <b>Esophagitis</b><br><i>Definition: A disorder characterized by inflammation of the esophageal wall.</i> |
|--------------------------|--------------------------------------------------------------------------------------------------------------------------------------|-----------------------------------------------------------------------------------------------------------|
| <b>Grade 1</b>           | Asymptomatic; clinical or diagnostic observations only; intervention not indicated                                                   | Asymptomatic; clinical or diagnostic observations only; intervention not indicated                        |
| <b>Grade 2</b>           | Symptomatic; medical intervention indicated; limiting instrumental ADL                                                               | Symptomatic; altered eating/swallowing; oral supplements indicated                                        |
| <b>Grade 3</b>           | Severe symptoms; limiting self-care ADL; oxygen indicated                                                                            | Severely altered eating/swallowing; tube feeding, TPN or hospitalization indicated                        |
| <b>Grade 4</b>           | Life-threatening respiratory compromise; urgent intervention indicated (e.g., tracheotomy or intubation)                             | Life-threatening consequences; urgent operative intervention indicated                                    |
| <b>Grade 5</b>           | Death                                                                                                                                | Death                                                                                                     |
